# Supplementary material for: Economic and social impacts of COVID-19 and public health measures: results from an anonymous online survey in Thailand, Malaysia, the UK, Italy and Slovenia
Source: PubMed Central journal article supplement (PMC8295020; doi:10.1136/bmjopen-2020-046863), 2021-07-20

## Supplementary figure for “Economic and social impacts of COVID-19 and public health measures: results from an anonymous online survey in Thailand, Malaysia, the United Kingdom, Italy and Slovenia”

Anne Osterrieder<sup>1,2</sup>, Giulia Cuman<sup>3</sup>, Wirichada Pan-ngum<sup>1,4</sup>, Phaik Kin Cheah<sup>5</sup>, Phee-Kheng Cheah<sup>6</sup>, Pimnara Peerawaranun<sup>1</sup>, Margherita Silan<sup>7</sup>, Miha Orazem<sup>8,9</sup>, Ksenija Perkovic<sup>10</sup>, Urh Groselj<sup>8,11</sup>, Mira Leonie Schneiders<sup>1,2,12</sup>, Tassawan Poomchaichote<sup>1,13</sup>, Naomi Waithira<sup>1,2</sup>, Supa-at Asarath<sup>1</sup>, Bhensri Naemiratch<sup>1</sup>, Supanat Ruangajorn<sup>1</sup>, Lenart Skof<sup>14</sup>, Natinee Kulpijit<sup>1</sup>, Constance R.S. Mackworth-Young<sup>15</sup>, Darlene Ongkili<sup>16</sup>, Rita Chanviriyavuth<sup>1</sup>, Mavuto Mukaka<sup>1,2</sup>, Phaik Yeong Cheah<sup>1,2,12,13</sup>

<sup>1</sup>Mahidol Oxford Tropical Medicine Research Unit, Faculty of Tropical Medicine, Mahidol University, Bangkok, 10400, Thailand

<sup>2</sup>Centre for Tropical Medicine & Global Health, Nuffield Department of Medicine, University of Oxford, Oxford, UK

<sup>3</sup>Paediatric Ethics Committee; Research Ethics Committee, University Hospital of Padua, Padua, Italy

<sup>4</sup>Department of Tropical Hygiene, Faculty of Tropical Medicine, Mahidol University, Bangkok, 10400, Thailand

<sup>5</sup>Faculty of Arts and Social Science, Universiti Tunku Abdul Rahman, Kampar, Malaysia

<sup>6</sup>Emergency and Trauma Department, Sabah Women and Children’s Hospital, Ministry of Health Malaysia, Kota Kinabalu, Malaysia

<sup>7</sup>Department of Statistical Sciences, University of Padua, Padua, Italy

<sup>8</sup>Faculty of Medicine, University of Ljubljana, Ljubljana, Slovenia

<sup>9</sup>Department of Radiation Oncology, Institute of Oncology Ljubljana, Ljubljana, Slovenia

<sup>10</sup>Institute for Social Studies, Science and Research Centre Koper, Koper, Slovenia

<sup>11</sup>Department of Endocrinology, Diabetes and Metabolic Diseases, University Children’s Hospital, University Medical Center, University Children’s Hospital Ljubljana, Ljubljana, Slovenia

<sup>12</sup>Ethox Centre, Nuffield Department of Population Health, University of Oxford, Oxford, UK

<sup>13</sup>The SoNAR-Global Network

<sup>14</sup>Institute for Philosophical Studies, Science and Research Centre Koper, Koper, Slovenia

<sup>15</sup>Department of Global Health and Development, London School of Hygiene and Tropical Medicine, London, UK

<sup>16</sup>Emergency and Trauma Department, Queen Elizabeth Hospital, Ministry of Health Malaysia, Kota Kinabalu, Malaysia

**Corresponding author:** Phaik Yeong Cheah, 420/6 Mahidol-Oxford Tropical Medicine 24 Research Unit, Faculty of Tropical Medicine, Rajvithi Road, Bangkok, Thailand, 10400. Email: phaikyeong@tropmedres.ac

### Supplementary Figure 1: Diagram showing the level of coordination of public information campaigns on COVID-19 in the five study countries.

Levels of coordination: 0 = no COVID-19 public information campaign; 1 = public officials urging caution about COVID-19; 2 = coordinated public information campaign (e.g. across traditional and social media). All countries ran public information campaigns at level 2 during the study period from 1<sup>st</sup> May to 30<sup>th</sup> June 2020. Data was provided by the Oxford COVID-19 Government Response Tracker<sup>32</sup> and downloaded from ‘Our World in Data’<sup>33</sup>.

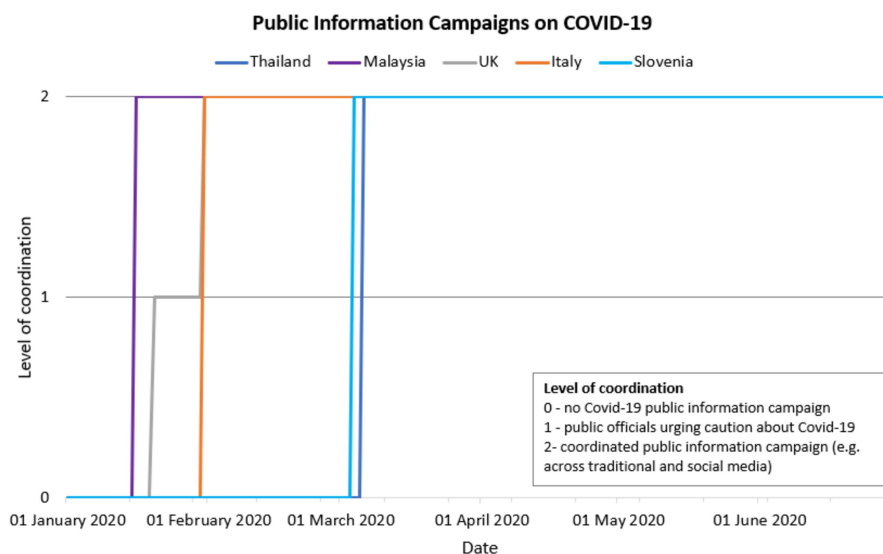

Supplement: bmjopen-2020-046863supp002.pdf [file bmjopen-2020-046863supp002.pdf]
